# Supplementary material for: A role of the sphingosine-1-phosphate (S1P)–S1P receptor 2 pathway in epithelial defense against cancer (EDAC)
Source: PubMed Central journal article supplement — Mol Biol Cell. 2016 Feb 1;27(3):491–9. doi: 10.1091/mbc.E15-03-0161 (PMC4751600; doi:10.1091/mbc.e15-03-0161), 2016-02-01
Supplement: supp_E15-03-0161v1_CombinedSupMats.pdf [file supp_E15-03-0161v1_CombinedSupMats.pdf]

# Supplemental Materials

*Molecular Biology of the Cell*

Yamamoto et al.

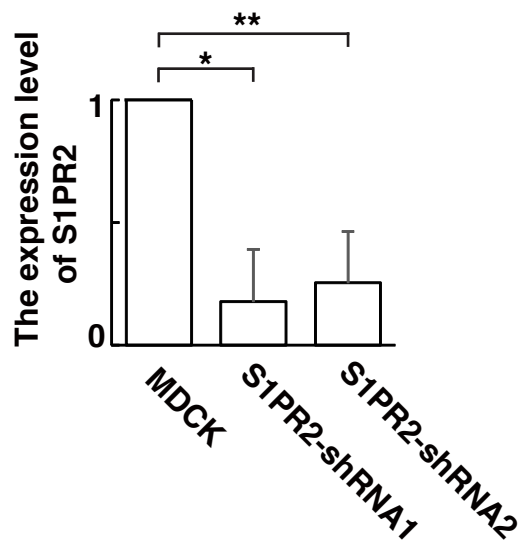

**Supplemental FIGURE 1:** Quantitative real-time PCR analyses for MDCK cells stably expressing S1PR2-shRNA1 or 2. Values are expressed as a ratio relative to MDCK. Expression of S1PR2 is significantly suppressed in S1PR2-shRNA-expressing MDCK cells. Data are mean  $\pm$  s.d. from two independent experiments. \* $P=0.031$ , \*\* $P=0.037$ .

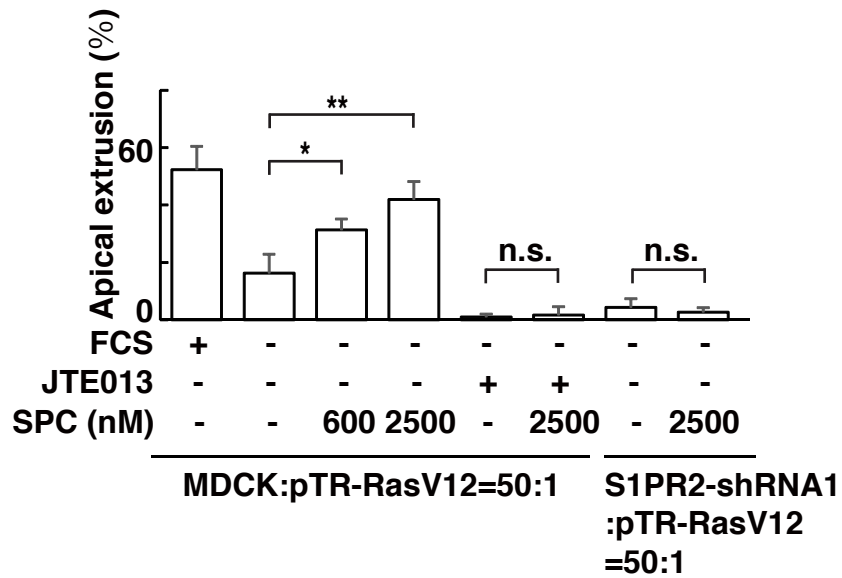

**Supplemental FIGURE 2:** SPC from the outer environment also positively regulates the apical extrusion of RasV12-transformed cells. Effect of exogenously added SPC on the apical extrusion of RasV12 cells that are surrounded by normal or S1PR2-knockdown cells in the absence or presence of JTE013. Data are mean  $\pm$  s.d. from three independent experiments. \* $P=0.026$ , \*\* $P=0.0079$ . n.s.: not significant.

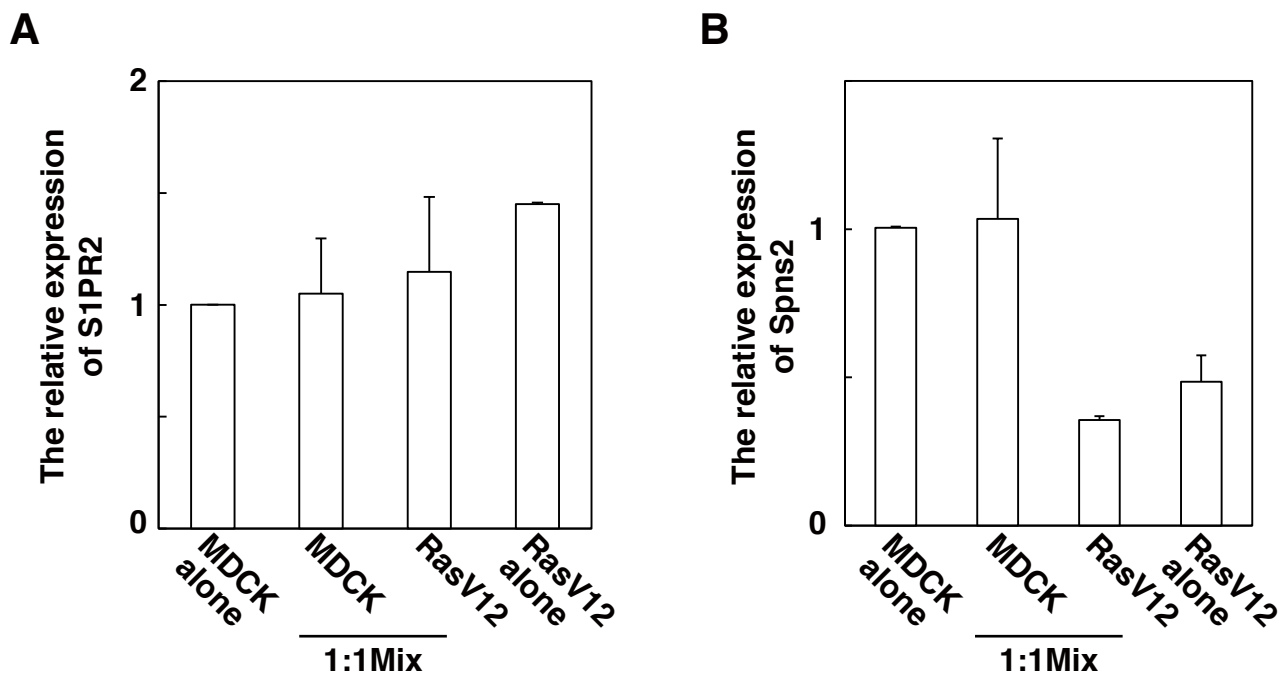

**Supplemental FIGURE 3:** Quantitative real-time PCR analyses of S1PR2 (A) or Spns2 (B). MDCK cells and MDCK-pTR GFP-RasV12 cells are cultured alone or co-cultured, and after sorting by FACS, cell lysates from each condition are subjected to quantitative real-time PCR analyses. Data are mean  $\pm$  s.d. from two independent experiments. Values are expressed as a ratio relative to MDCK alone.
